# Supplementary material for: Contact and Fumigant Activities of Citrus aurantium Essential Oil against the Stable Fly Stomoxys calcitrans (Diptera: Muscidae)
Source: MDPI journal article supplement (doi:10.3390/plants11091122), 2022-04-21
Supplement: s1 [file s1]

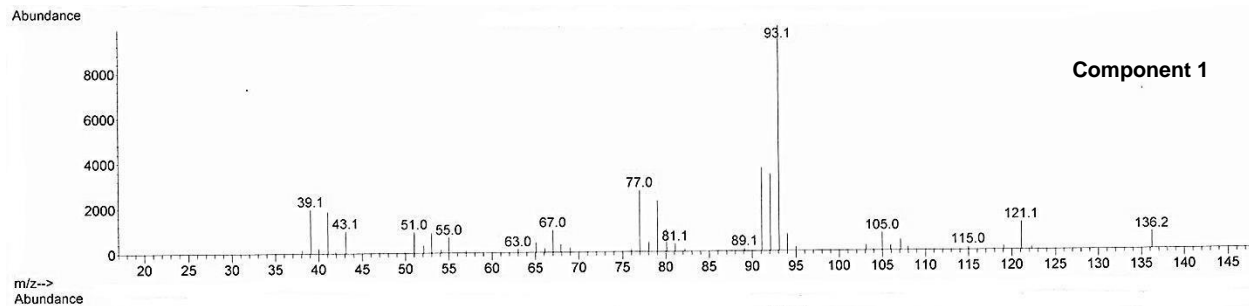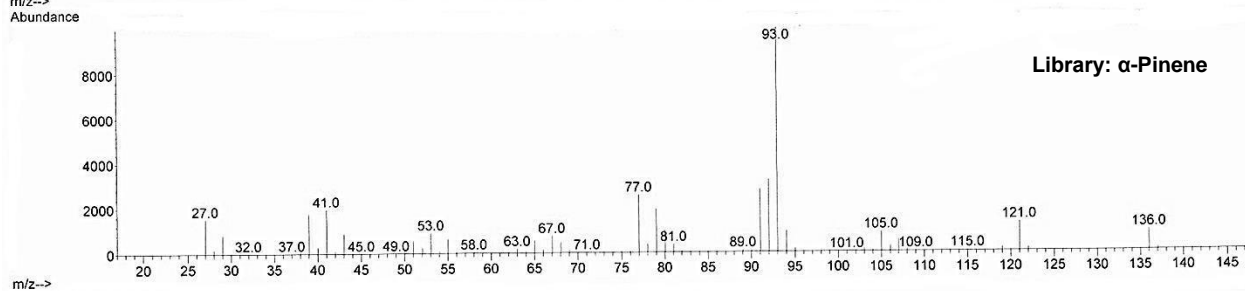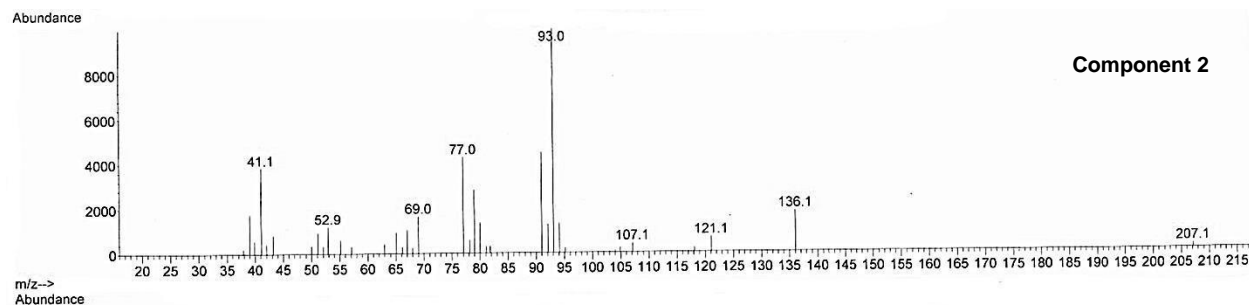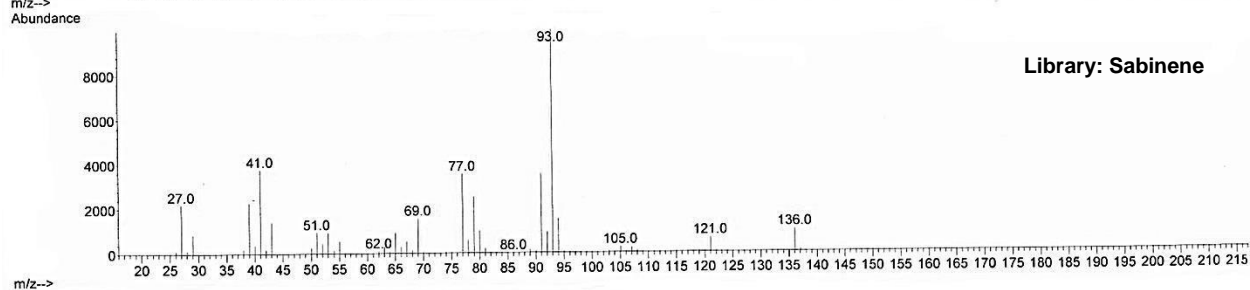

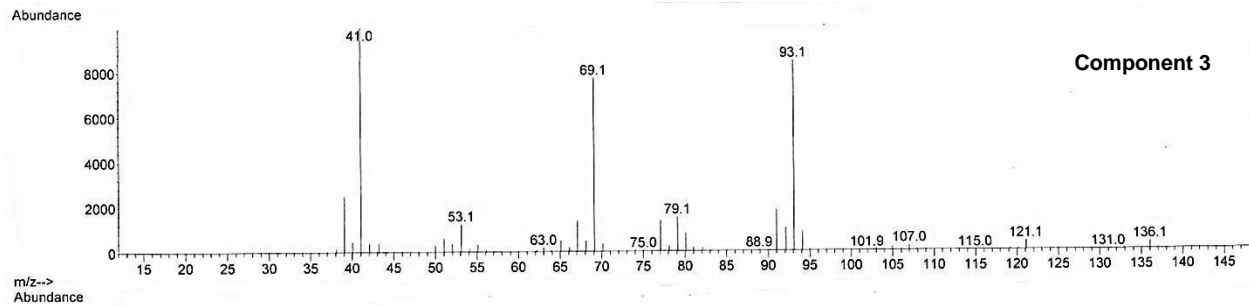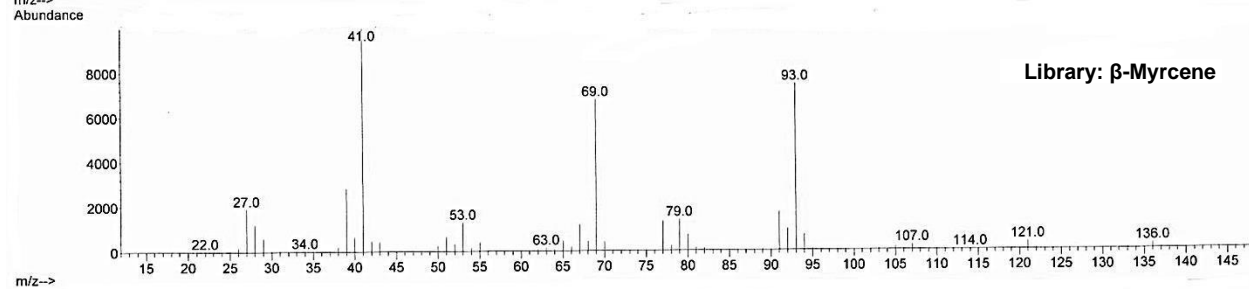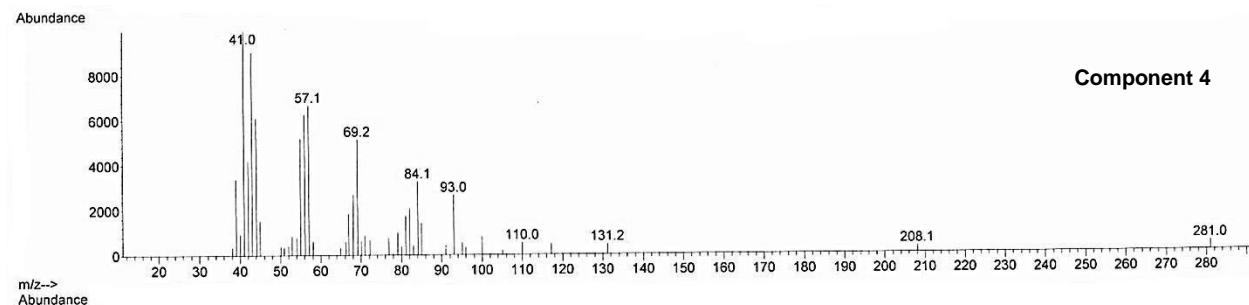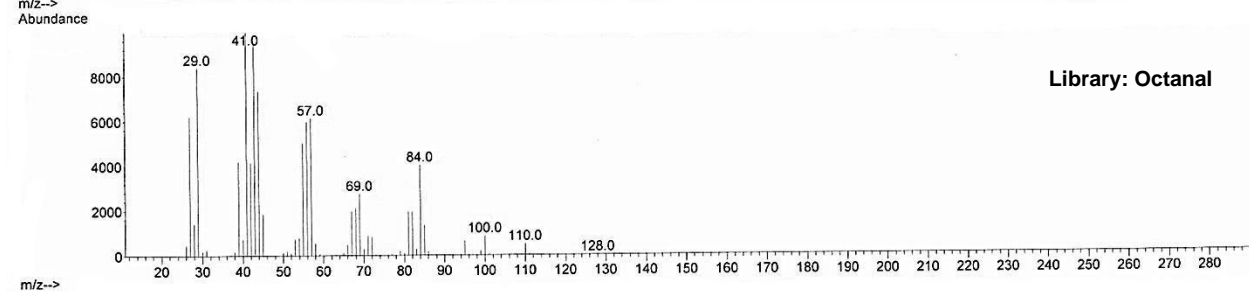

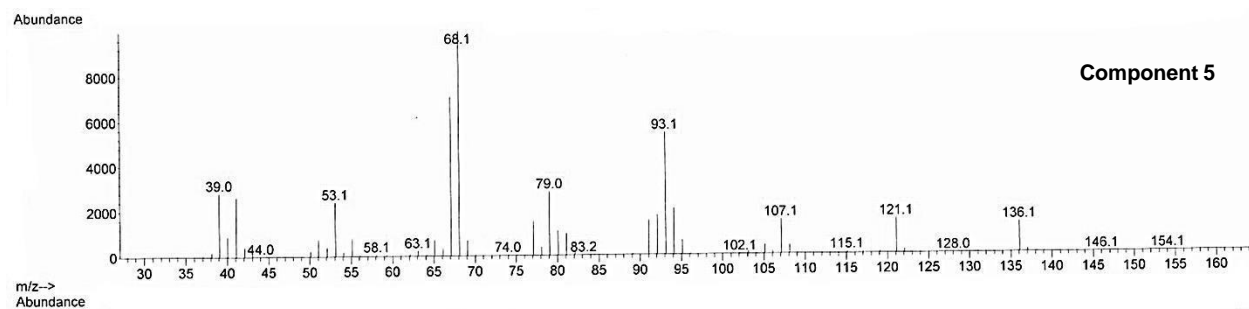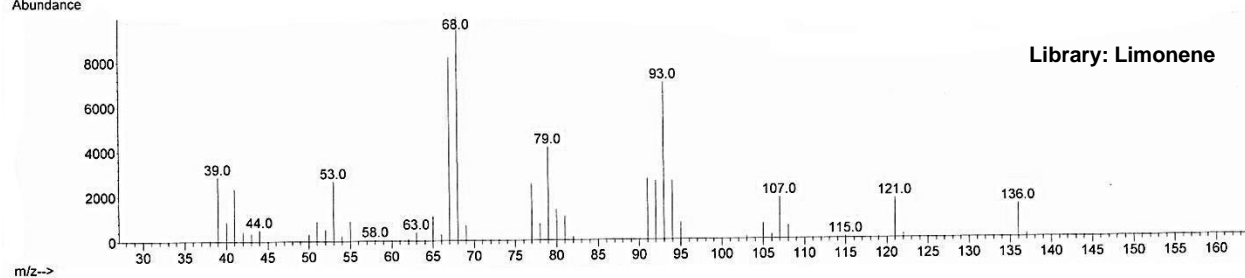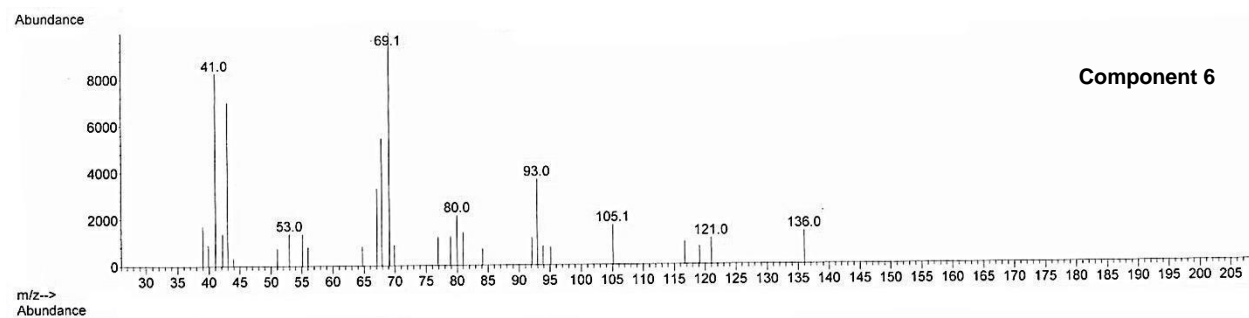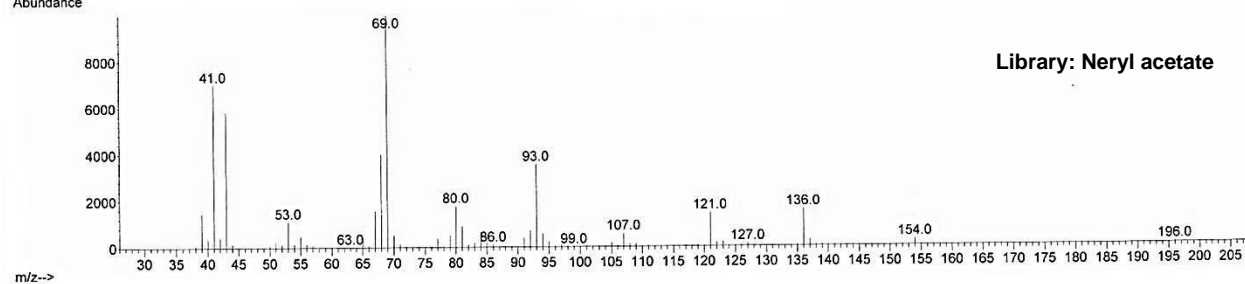

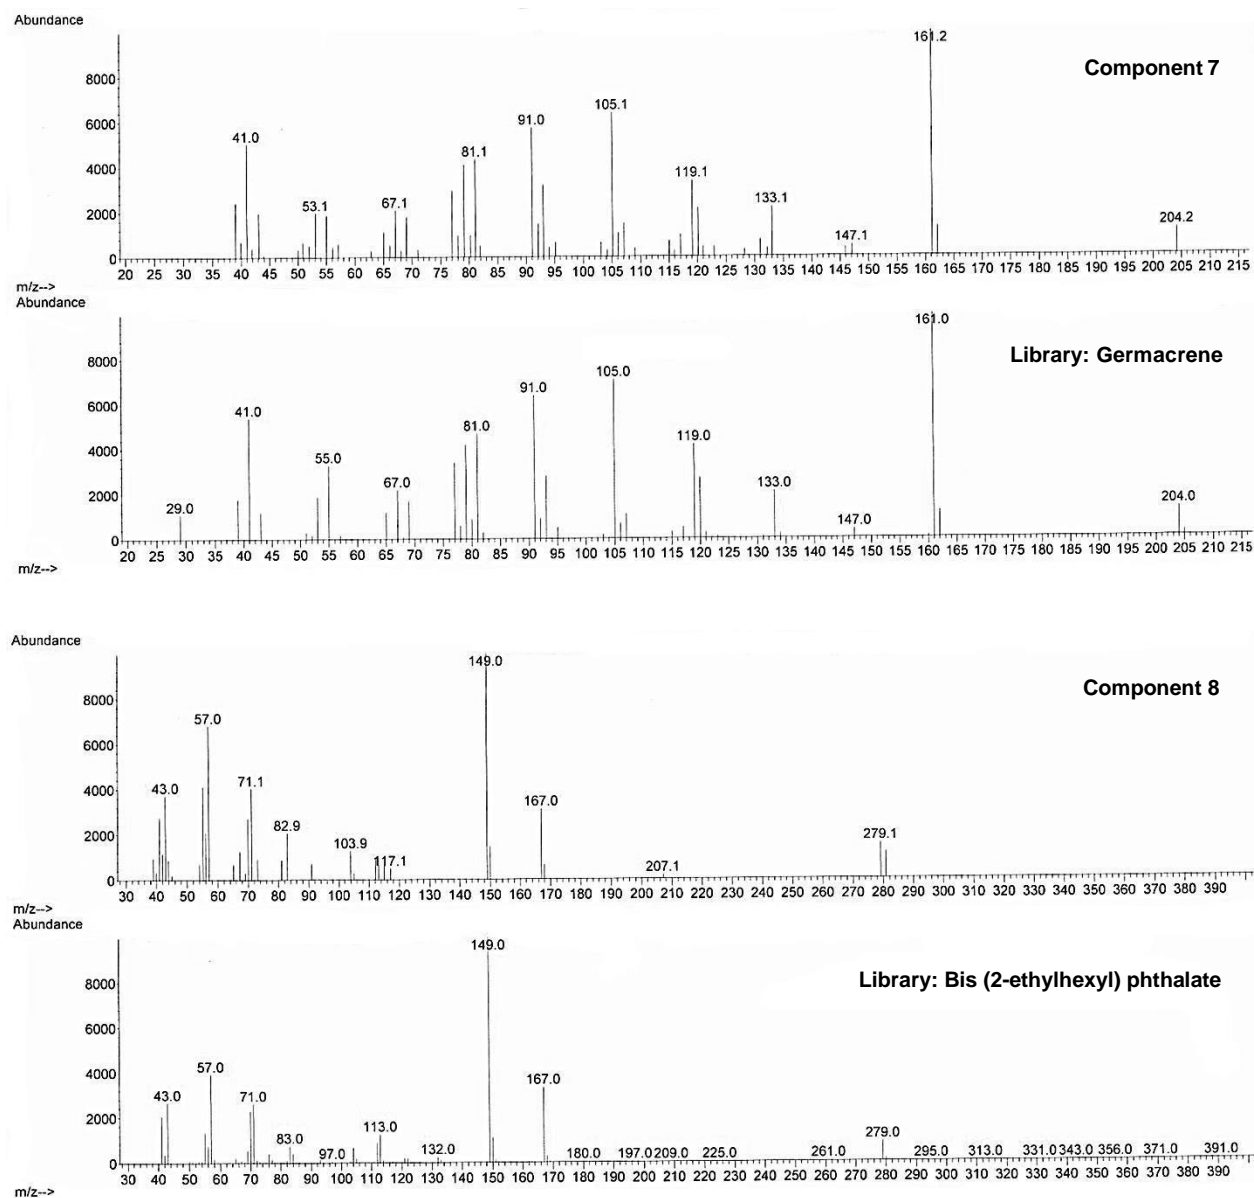

**Figure S1.** Mass spectra of compounds in *Citrus aurantium* essential oil with standard mass spectra from Wiley 7N edition (Mass Spectra library)
